# Supplementary material for: FANTOM5 transcriptome catalog of cellular states based on Semantic MediaWiki
Source: Oxford University Press journal article supplement (doi:10.1093/database/baw105), 2016-01-01
Supplement: baw105_Supplementary_Data.zip [file baw105_Supplementary_Data.zip]

```

function collectdata(){
data = [];
    for (i2=1, len2=oTable.fnSettings().aoColumns.length; i2<len2; i2++){
        var plots = [];
        for (i1=2, len1=$('#gene_exptable tr').length; i1<len1; i1++) {
            plots.push([i1,$("#gene_exptable
tr")[i1].cells[i2].innerHTML]);
        }
        data.push({"label":
$(oTable.fnSettings().aoColumns[i2].sTitle).text(), "data": plots});
    }
slist = [];
    for (i1=2, len1=$('#gene_exptable tr').length; i1<len1; i1++) {
        slist.push($("#gene_exptable
tr")[i1].cells[0].innerHTML);
    }
}
function drawchart(){
plotdata = [];

$("#gene_exptable_chart_checkbox").find("input:checked").each(function () {
    var key = $(this).attr("name");
    plotdata.push(data[$(this).attr("name")]);
});

var plot1 = $.plot($("#gene_exptable_chart"), plotdata, {
    yaxis : { axisLabel : 'TPM' },
    lines : { show : false },
    points : { show : true },
    grid: { hoverable: true, clickable: true },
    xaxis : { tickDecimals : 0, show: false },
    legend: { show: false }
});
}

```

**Figure S3 JavaScript for graphical and interactive exploration of TSSs expression**  
Custom JavaScript code has been added to reflect data in (Figure 3B) and (Figure 3C).
