# Supplementary material for: FANTOM5 transcriptome catalog of cellular states based on Semantic MediaWiki
Source: Oxford University Press journal article supplement (doi:10.1093/database/baw105), 2016-01-01
Supplement: baw105_Supplementary_Data.zip [file baw105_Supplementary_Data.zip]

(A)

```
{{#ask:[[Category: FF Samples]]
|?#
|?Name=Source Name
|?Sample species
|?Sample sex=Characteristics [sex]
|?Rna extraction protocol=RNA extraction protocol
|?Id=Sample Name
}}
```

(B)

|             | Source Name                                              | Sample species               | Characteristics [sex] | RNA extraction protocol                            | Sample Name    |
|-------------|----------------------------------------------------------|------------------------------|-----------------------|----------------------------------------------------|----------------|
| 10000-101A1 | Clontech Human Universal Reference Total RNA, pool1      | Human (Homo sapiens)         | mixed                 | OP-RNA-extraction-totalRNA-TRIzol-isopropanol-v1.0 | FF:10000-101A1 |
| 10001-101A3 | Clontech Mouse Universal Reference Total RNA, pool1      | Mouse (Mus musculus)         | mixed                 | OP-RNA-extraction-totalRNA-TRIzol-isopropanol-v1.0 | FF:10001-101A3 |
| 10002-101A5 | SABiosciences XpressRef Human Universal Total RNA, pool1 | Human (Homo sapiens)         | mixed                 | OP-RNA-extraction-totalRNA-TRIzol-isopropanol-v1.0 | FF:10002-101A5 |
| 10003-101A7 | SABiosciences XpressRef Mouse Universal Total RNA, pool1 | Mouse (Mus musculus)         | mixed                 | OP-RNA-extraction-totalRNA-TRIzol-isopropanol-v1.0 | FF:10003-101A7 |
| 10004-101A9 | chicken embryo whole body, day10 (HH37)                  | Chicken (Gallus gallus)      | unknown               | OP-RNA-extraction-totalRNA-TRIzol-isopropanol-v1.0 | FF:10004-101A9 |
| 10006-101B2 | Universal RNA - Dog Normal Tissues Biochain, pool1       | Dog (Canis lupus familiaris) | mixed                 | OP-RNA-extraction-totalRNA-TRIzol-isopropanol-v1.0 | FF:10006-101B2 |
| 10007-101B4 | Universal RNA - Human Normal Tissues Biochain, pool1     | Human (Homo sapiens)         | mixed                 | OP-RNA-extraction-totalRNA-TRIzol-isopropanol-v1.0 | FF:10007-101B4 |
| 10008-101B6 | Universal RNA - Mouse Normal Tissues Biochain, pool1     | Mouse (Mus musculus)         | mixed                 | OP-RNA-extraction-totalRNA-TRIzol-isopropanol-v1.0 | FF:10008-101B6 |
| 10009-101B8 | Universal RNA - Rat Normal Tissues Biochain, pool1       | Rat (Rattus rattus)          | mixed                 | OP-RNA-extraction-totalRNA-TRIzol-isopropanol-v1.0 | FF:10009-101B8 |
| 10010-101C1 | adipose tissue, adult, pool1                             | Human (Homo sapiens)         | mixed                 | OP-RNA-extraction-totalRNA-ToTALLY-RNA-v1.0        | FF:10010-101C1 |

**Fig S4. Sample attributes list generated with semantic query**

Semantic query (A) is used to list and export information regarding biological sample attributes (B).
